# Supplementary material for: Bifidobacterium breve M-16V alleviates cow's milk allergy by regulating the gut microbiota and metabolites in human microbiota-associated mice
Source: Royal Society of Chemistry journal article supplement (doi:10.1039/d5fo02012c), 2025-01-01
Supplement: d5fo02012c1.pdf [file d5fo02012c1.pdf]

## Supplementary information

### ***Bifidobacterium breve* M-16V alleviates cow's milk allergy by regulating gut microbiota and metabolites in human microbiota-associated mice**

Huming Shao<sup>1,2,3</sup>, Fangfang Min<sup>1,2,3</sup>, Tianliang Bai<sup>1,2,3</sup>, Yan Liu<sup>1,2,3</sup>, Shuangyan Zheng<sup>1,3,4</sup>, Yong Wu<sup>1,3,4</sup>, Can Di<sup>5</sup>, Min Lin<sup>6</sup>, Xin Li<sup>1,2,3\*</sup>, Hongbing Chen<sup>1,3,4</sup>

<sup>1</sup> *State Key Laboratory of Food Science and Resources, Nanchang University, Nanchang 330047, Jiangxi, P. R. China;*

<sup>2</sup> *College of Food Science and Technology, Nanchang University, Nanchang 330031, Jiangxi, P. R. China;*

<sup>3</sup> *Jiangxi Province Key Laboratory of Food Allergy, Nanchang University, Nanchang, 330047, Jiangxi, P. R. China;*

<sup>4</sup> *Sino-German Joint Research Institute, Nanchang University, Nanchang 330047, Jiangxi, P. R. China;*

<sup>5</sup> *BYHEALTH Institute of Nutrition & Health, Guangzhou, Guangdong 510700, P. R. China;*

<sup>6</sup> *Department of Dermatology, Jiangxi Provincial Children's Hospital, Nanchang 330038, Jiangxi, P. R. China.*

---

\*Corresponding author, Xin Li. State Key Laboratory of Food Science and Resources, Nanchang University, Address: 235 Nanjing Dong Road, Nanchang, 330047, PR China;

E-mail address: [zhizilixin@ncu.edu.cn](mailto:zhizilixin@ncu.edu.cn) (Xin Li).

**Supplementary Tables**

**Table S1.** General characteristics of the CMA donors.

| Donor             | Donor-1              | Donor-2              | Donor-3              |
|-------------------|----------------------|----------------------|----------------------|
| Sex               | Male                 | Female               | Male                 |
| Age, months       | 20                   | 30                   | 13                   |
| Weight, kg        | 9                    | 13                   | 10.5                 |
| Height, cm        | 81                   | 95                   | 78                   |
| Milk-sIgE, IU/mL  | 6.5                  | 0.35                 | 0.6                  |
| Allergic symptoms | Itchiness and eczema | Itchiness and eczema | Itchiness and eczema |

**Table S2.** Scoring rules for anaphylactic symptoms.

| Score | Symptoms                                                                                                                            |
|-------|-------------------------------------------------------------------------------------------------------------------------------------|
| 0     | No symptoms                                                                                                                         |
| 1     | Scratching and rubbing around the nose and head                                                                                     |
| 2     | Puffiness around the eyes and mouth, pilar erection, reduced activity,<br>and/or decreased activity with increased respiratory rate |
| 3     | Wheezing, labored respiration, and cyanosis around<br>the mouth and the tail                                                        |
| 4     | No activity after prodding or tremor and convulsion                                                                                 |
| 5     | Death                                                                                                                               |

**Table S3.** Primers used in quantitative polymerase chain reaction experiments.

| Gene             | Prime   | Sequence (5'-3')         |
|------------------|---------|--------------------------|
| <i>Gapdh</i>     | Forward | CCTGTTGCTGTAGCCGTATTCA   |
|                  | Reverse | CCAGGTTGTCTCCTGCGACTT    |
| <i>Zo-1</i>      | Forward | CGAGGCATCATCCCAAATAAGAAC |
|                  | Reverse | TCCAGAAGTCTGCCCCGATCAC   |
| <i>Occludin</i>  | Forward | TTGAAAGTCCACCTCCTTACAGA  |
|                  | Reverse | CCGGATAAAAAGAGTACGCTGG   |
| <i>Claudin-1</i> | Forward | GCCTTGATGGTAATTGGCATCC   |
|                  | Reverse | GGCCACTAATGTCGCCAGAC     |

## Supplementary Figure

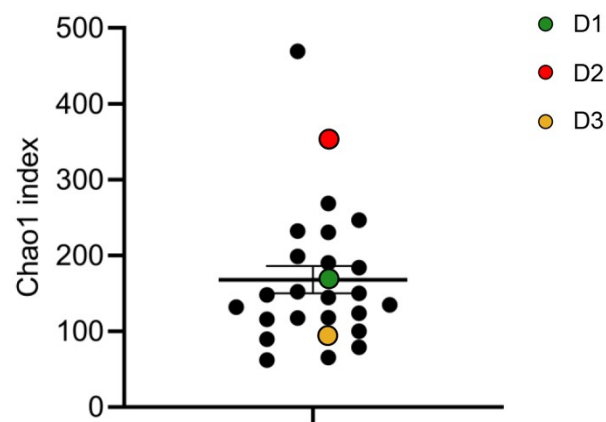

**Figure S1.** Chao1 index in the cohort of food allergy children, and the donors selected for fecal microbiota transplantation are marked with colored green, red, and yellow circles corresponding to donors 1, 2, and 3, respectively. D1: Donor-1; D2: Donor-2; D3: Donor-3.
